# Supplementary material
Source: PubMed Central journal article supplement (PMC6888040)
Supplement: Supplementary_Data.pdf [file Supplementary_Data.pdf]

Table SI. Changes of immunoglobulins by the ingestion of fucoidan.

|             | 0        | 1M       | 2M       | 3M       | 4M       | 5M       | 6M       |
|-------------|----------|----------|----------|----------|----------|----------|----------|
| IgG (mg/dl) | 1402±426 | 1380±408 | 1365±447 | 1340±366 | 1407±423 | 1391±394 | 1216±499 |
| IgA (mg/dl) | 346±116  | 331±133  | 324±129  | 326±126  | 329±133  | 324±125  | 299±154  |
| IgE (IU/ml) | 121±242  | 130±264  | 121±243  | 150±339  | 156±355  | 148±334  | 133±294  |

Table SII. Changes of hematology parameters by the ingestion of fucoidan.

| Parameters                 | 0              | 1M              | 2M              | 3M              | 4M              | 5M              | 6M              |
|----------------------------|----------------|-----------------|-----------------|-----------------|-----------------|-----------------|-----------------|
| Neutr ( $\mu\text{l}$ )    | 3610 $\pm$ 899 | 3744 $\pm$ 1500 | 3713 $\pm$ 2547 | 3254 $\pm$ 1458 | 3217 $\pm$ 1016 | 3210 $\pm$ 992  | 3591 $\pm$ 1390 |
| Lymph ( $\mu\text{l}$ )    | 2006 $\pm$ 529 | 1653 $\pm$ 715  | 1637 $\pm$ 699  | 2733 $\pm$ 2403 | 3306 $\pm$ 3851 | 2832 $\pm$ 1899 | 2632 $\pm$ 2999 |
| Mono ( $\mu\text{l}$ )     | 302 $\pm$ 148  | 341 $\pm$ 159   | 328 $\pm$ 158   | 331 $\pm$ 150   | 344 $\pm$ 130   | 270 $\pm$ 138   | 315 $\pm$ 156   |
| Baso ( $\mu\text{l}$ )     | 112 $\pm$ 137  | 138 $\pm$ 144   | 119 $\pm$ 130   | 101 $\pm$ 84    | 130 $\pm$ 94    | 67 $\pm$ 44     | 130 $\pm$ 96    |
| RBC ( $10^4/\mu\text{l}$ ) | 432 $\pm$ 42   | 437 $\pm$ 40    | 434 $\pm$ 42    | 429 $\pm$ 48    | 431 $\pm$ 40    | 424 $\pm$ 33    | 415 $\pm$ 36    |
| Hb (g/dl)                  | 13.3 $\pm$ 1.1 | 13.4 $\pm$ 0.8  | 13.3 $\pm$ 1.1  | 13.0 $\pm$ 1.2  | 13.3 $\pm$ 1.2  | 12.9 $\pm$ 1.2  | 12.6 $\pm$ 1.4  |
| Plt ( $10^4/\mu\text{l}$ ) | 22.3 $\pm$ 5.1 | 22.8 $\pm$ 4.4  | 23.6 $\pm$ 5.0  | 23.8 $\pm$ 5.6  | 22.3 $\pm$ 4.9  | 22.3 $\pm$ 4.7  | 21.8 $\pm$ 5.7  |

Neutr, neutrophils; Lymph, lymphocytes; Mono, monocytes; Baso, basophils; RBC, red blood cells; Hb, hemoglobin; Plt, platelets.

Table III. Changes of biochemical parameters by the ingestion of fucoidan.

|               | 0         | 1M        | 2M        | 3M        | 4M        | 5M        | 6M        |
|---------------|-----------|-----------|-----------|-----------|-----------|-----------|-----------|
| Alb (g/dl)    | 4.2±0.3   | 4.1±0.3   | 4.0±0.4   | 4.0±0.3   | 4.2±0.2   | 4.1±0.2   | 4.2±0.5   |
| T.Bil (mg/dl) | 0.58±0.23 | 0.53±0.26 | 0.54±0.27 | 0.51±0.23 | 0.55±0.27 | 0.51±0.24 | 0.50±0.28 |
| AST (U/l)     | 32±8      | 35±19     | 32±16     | 29±11     | 30±11     | 32±17     | 31±13     |
| ALT (U/l)     | 30±17     | 34±35     | 28±14     | 25±15     | 25±13     | 29±26     | 31±20     |
| ALP (U/l)     | 250±77    | 252±81    | 257±83    | 252±70    | 250±79    | 242±70    | 258±88    |
| γ-GTP (U/l)   | 47±40     | 49±45     | 43±38     | 39±34     | 38±28     | 38±28     | 48±42     |
| LDL (mg/dl)   | 103±28    | 105±22    | 101±24    | 103±23    | 101±18    | 105±24    | 106±21    |
| HDL (mg/dl)   | 59±15     | 58±14     | 59±12     | 58±11     | 61±17     | 58±14     | 60±13     |
| TG (mg/dl)    | 151±107   | 154±93    | 143±69    | 147±66    | 149±82    | 164±75    | 134±86    |
| BUN (mg/dl)   | 17.7±4.1  | 16.8±4.9  | 15.3±3.9  | 16.9±4.3  | 16.5±4.3  | 16.8±4.8  | 17.2±5.1  |
| Cr (mg/dl)    | 0.79±0.23 | 0.76±0.23 | 0.79±0.23 | 0.76±0.2  | 0.77±0.23 | 0.8±0.23  | 0.72±0.21 |
| UA (mg/dl)    | 5.4±1.5   | 5.4±1.4   | 5.3±1.3   | 5.4±1.5   | 5.5±1.4   | 5.6±1.3   | 5.5±1.4   |
| Na (mEq/l)    | 140±2     | 140±3     | 141±2     | 141±2     | 141±1     | 140±3     | 141±5     |
| K (mEq/l)     | 4.1±0.3   | 4.2±0.4   | 4.1±0.5   | 4.1±0.4   | 4.0±0.4   | 4.3±0.6   | 4.0±0.6   |
| Ca (mg/dl)    | 9.1±0.3   | 9.0±0.2   | 9.0±0.4   | 8.9±0.3   | 9.1±0.3   | 9.1±0.2   | 8.9±0.8   |

Alb, albumin; T.Bil, total bilirubin; AST, aspartate aminotransferase; ALT, alanine transaminase; Alp, alkaline phosphatase; γ-GTP, γ-glutamyl transferase; LDL, low-density lipoprotein cholesterol; HDL, high-density lipoprotein cholesterol; TG, triglyceride; BUN, blood urea nitrogen; Cr, creatinine; UA, uric acid; Na, sodium; K, potassium; Ca, calcium.
